# Supplementary material for: RNA-seq and flow-cytometry of conventional, scalp, and palmoplantar psoriasis reveal shared and distinct molecular pathways
Source: PubMed Central journal article supplement (PMC6063960; doi:10.1038/s41598-018-29472-w), 2018-07-27

**RNA-seq and flow-cytometry of conventional, scalp, and palmoplantar psoriasis  
reveal shared and distinct molecular pathways**

Richard Ahn<sup>1\*+</sup>, Di Yan<sup>1,2\*</sup>, Hsin-Wen Chang<sup>1</sup>, Kristina Lee<sup>1</sup>, Shrishti Bhattarai<sup>1</sup>, Zhi-Ming Huang<sup>1</sup>, Mio Nakamura<sup>1</sup>, Rasnik Singh<sup>1</sup>, Ladan Afifi<sup>1</sup>, Keyon Taravati<sup>1</sup>, Priscila Munoz-Sandoval<sup>1</sup>, Mariela Pauli<sup>1</sup>, Michael D. Rosenblum<sup>1</sup>, Wilson Liao<sup>1</sup>

<sup>1</sup>Department of Dermatology, University of California, San Francisco, San Francisco, CA, United States.

<sup>2</sup>School of Medicine, Case Western Reserve University, Cleveland, OH, United States.

\*Authors contributed equally to this paper

+Correspondence should be addressed to Richard Ahn, PhD, Department of Dermatology, University of California, San Francisco, 2340 Sutter Street, Box 0808, San Francisco, CA 94143-0808, USA (email: richard.ahn@ucsf.edu)

Supplementary Figure 1

Scale Independence

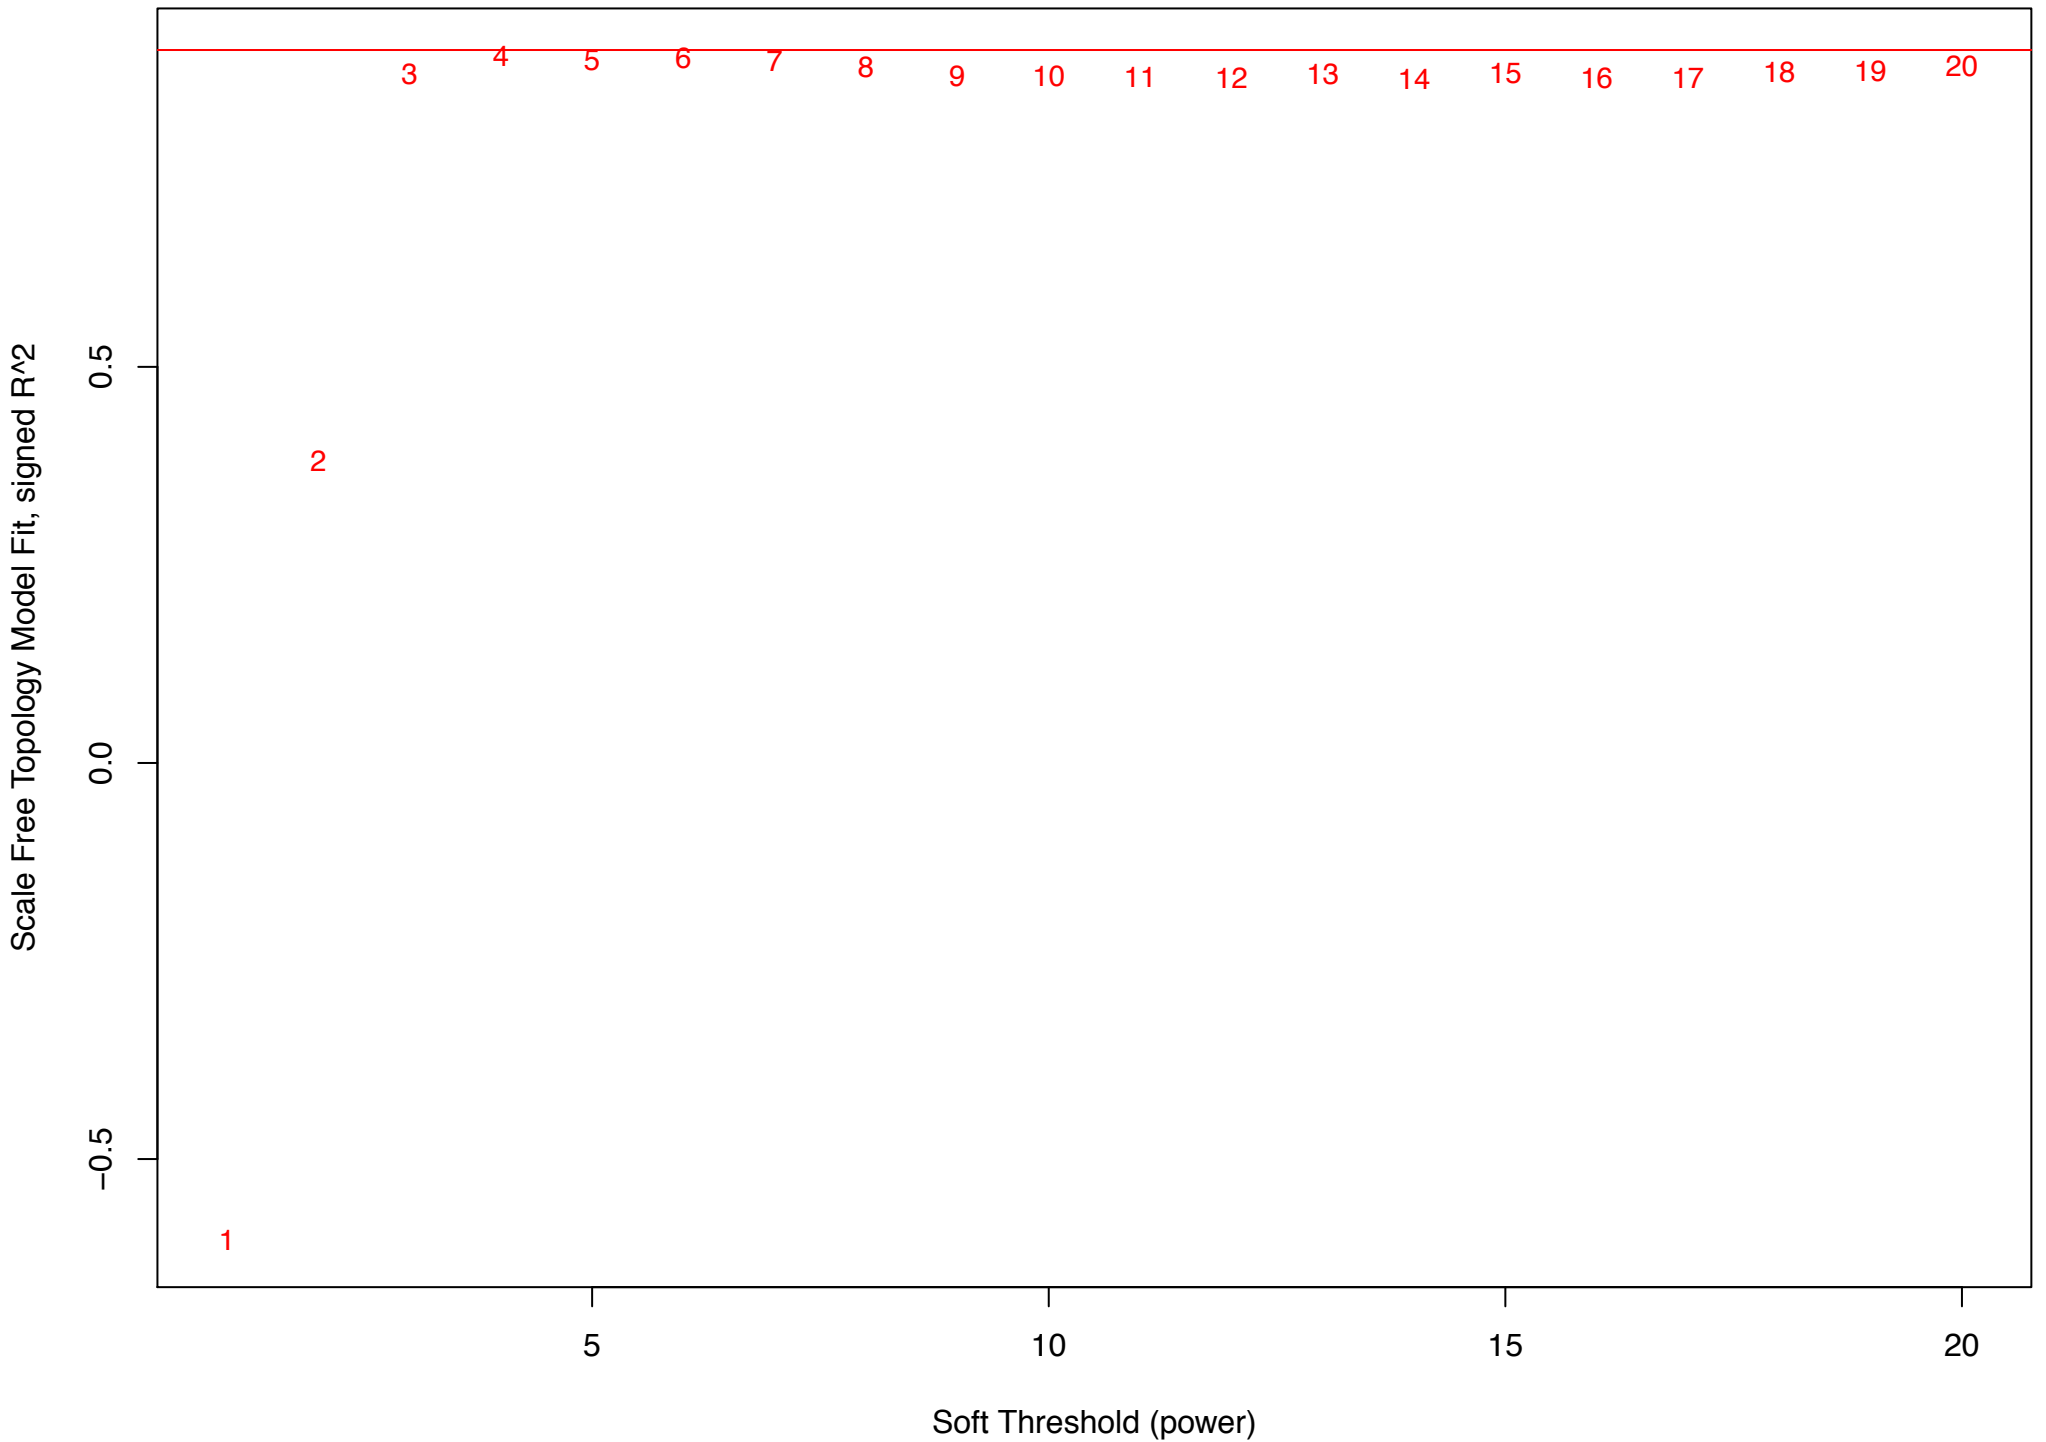

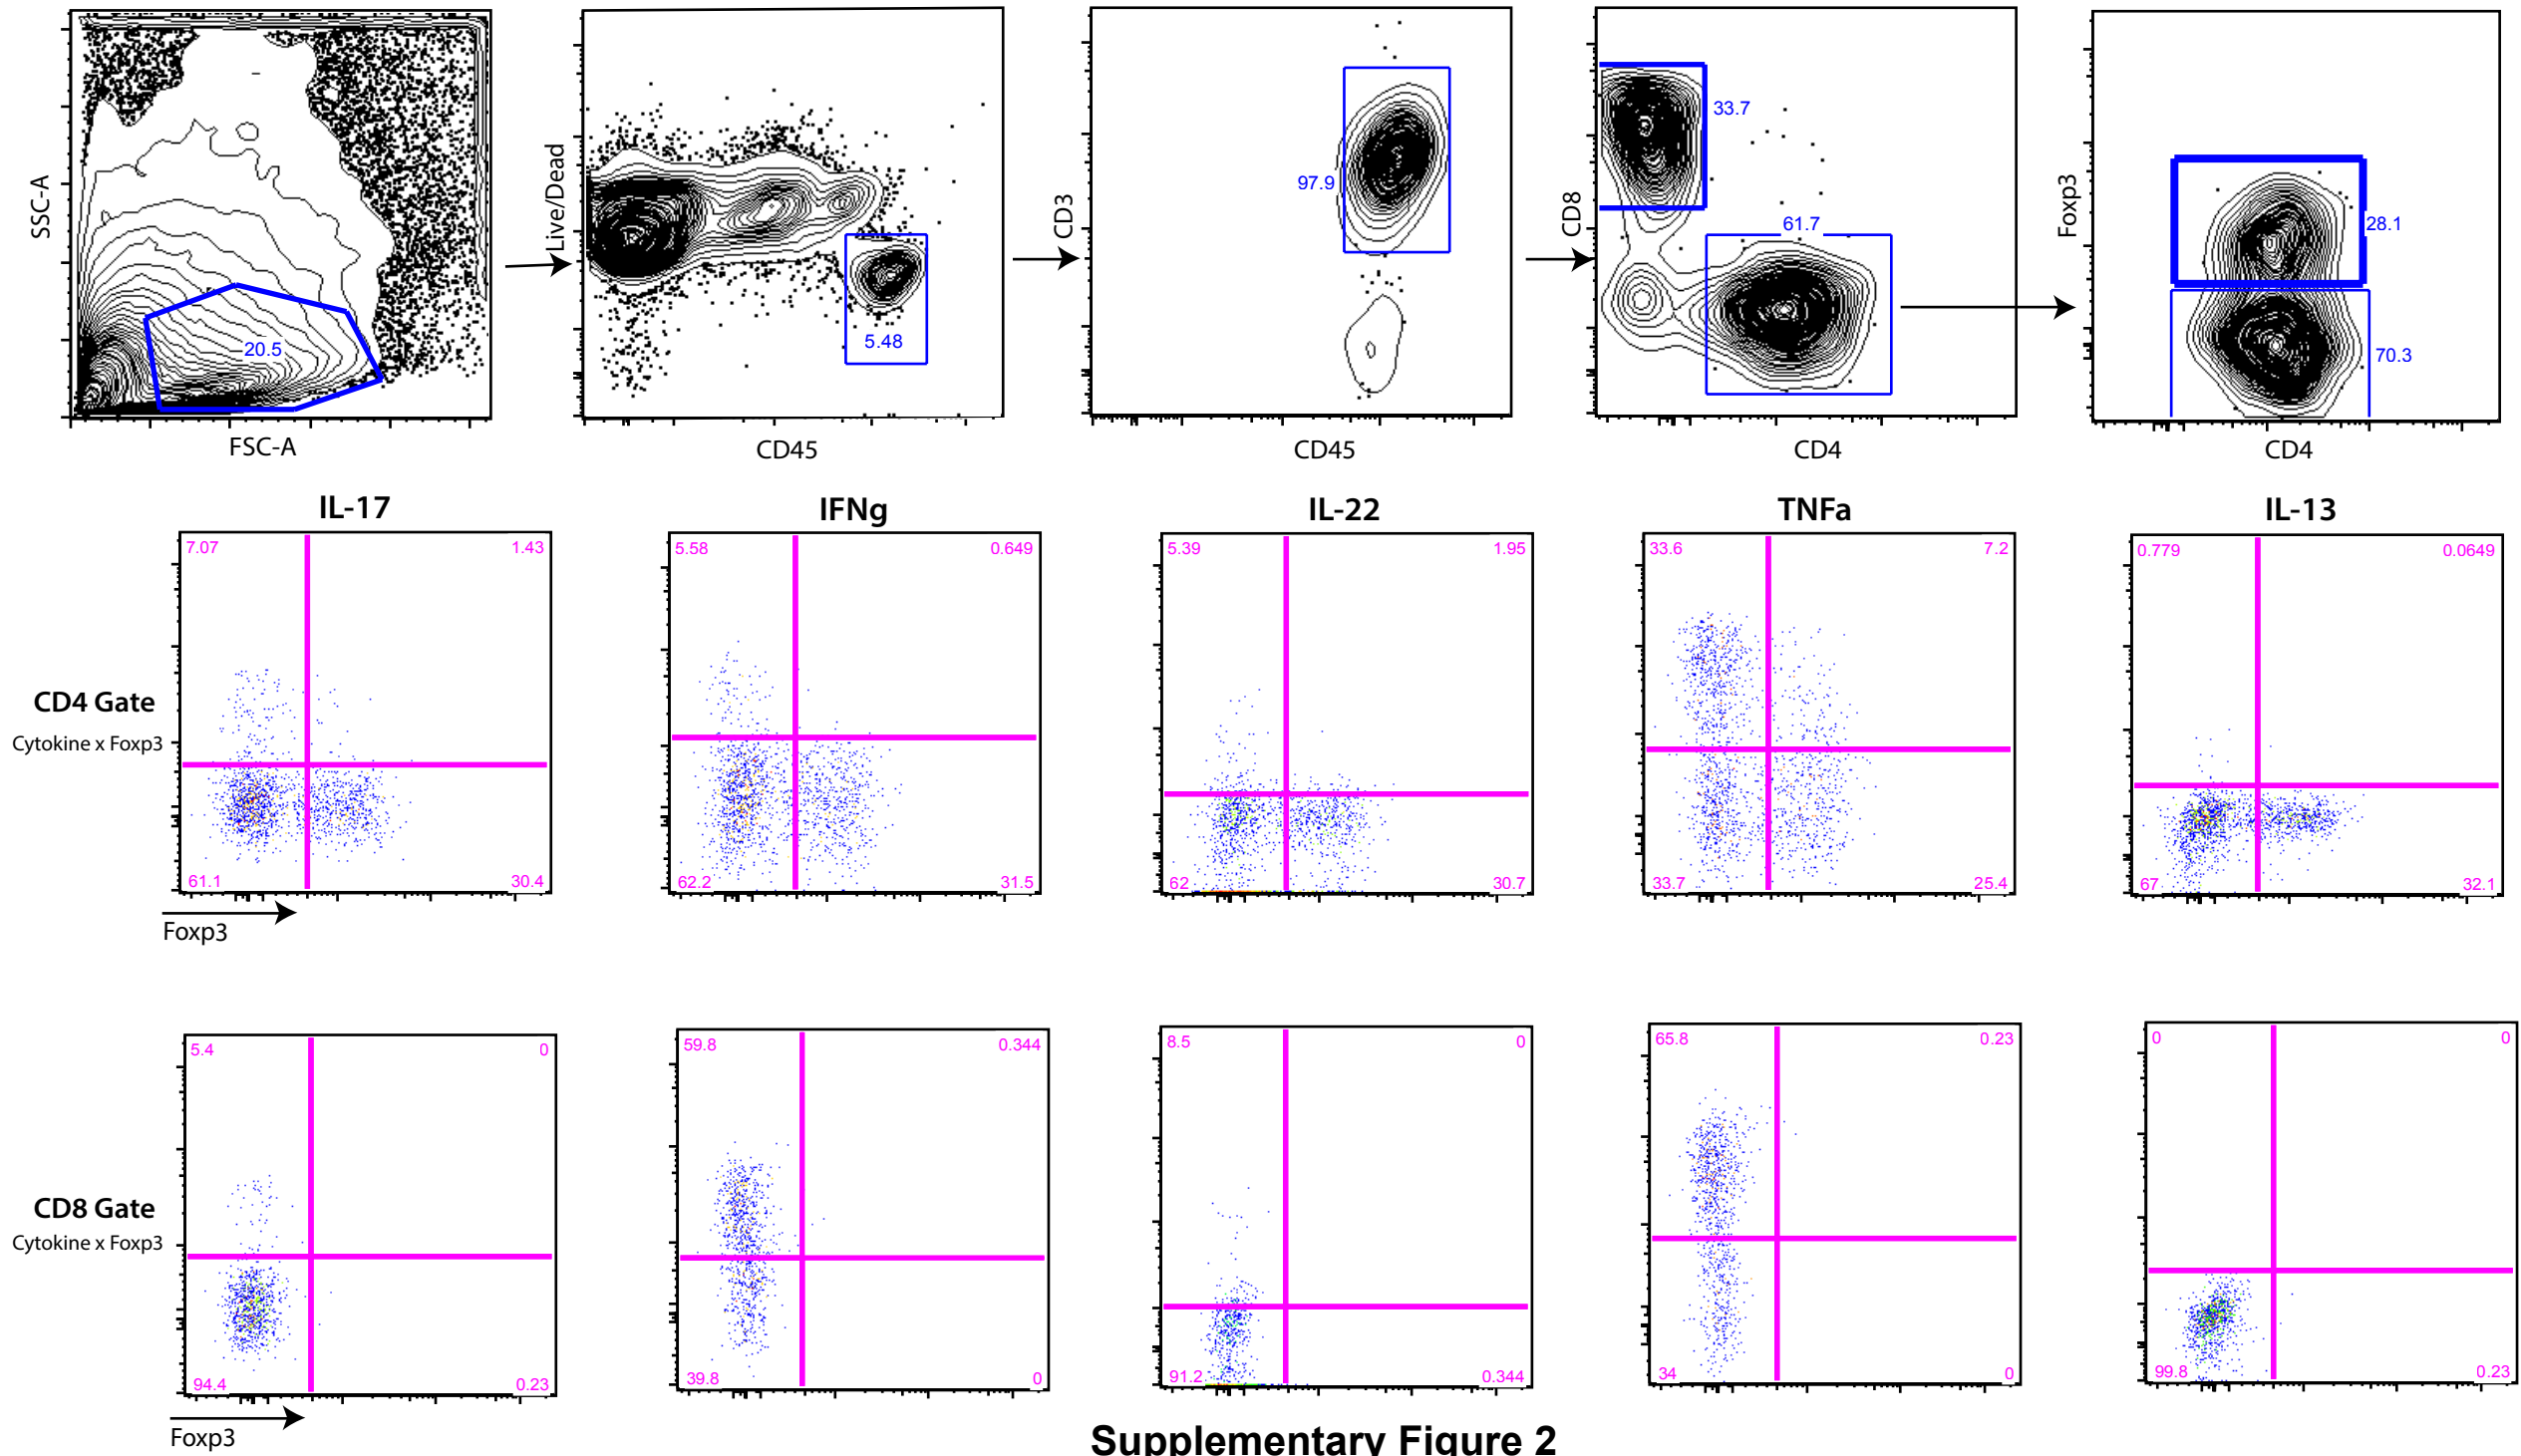

Supplementary Figure 2

Supplementary Figure 3

Volcano plot of IL17A High vs Low in CD8s

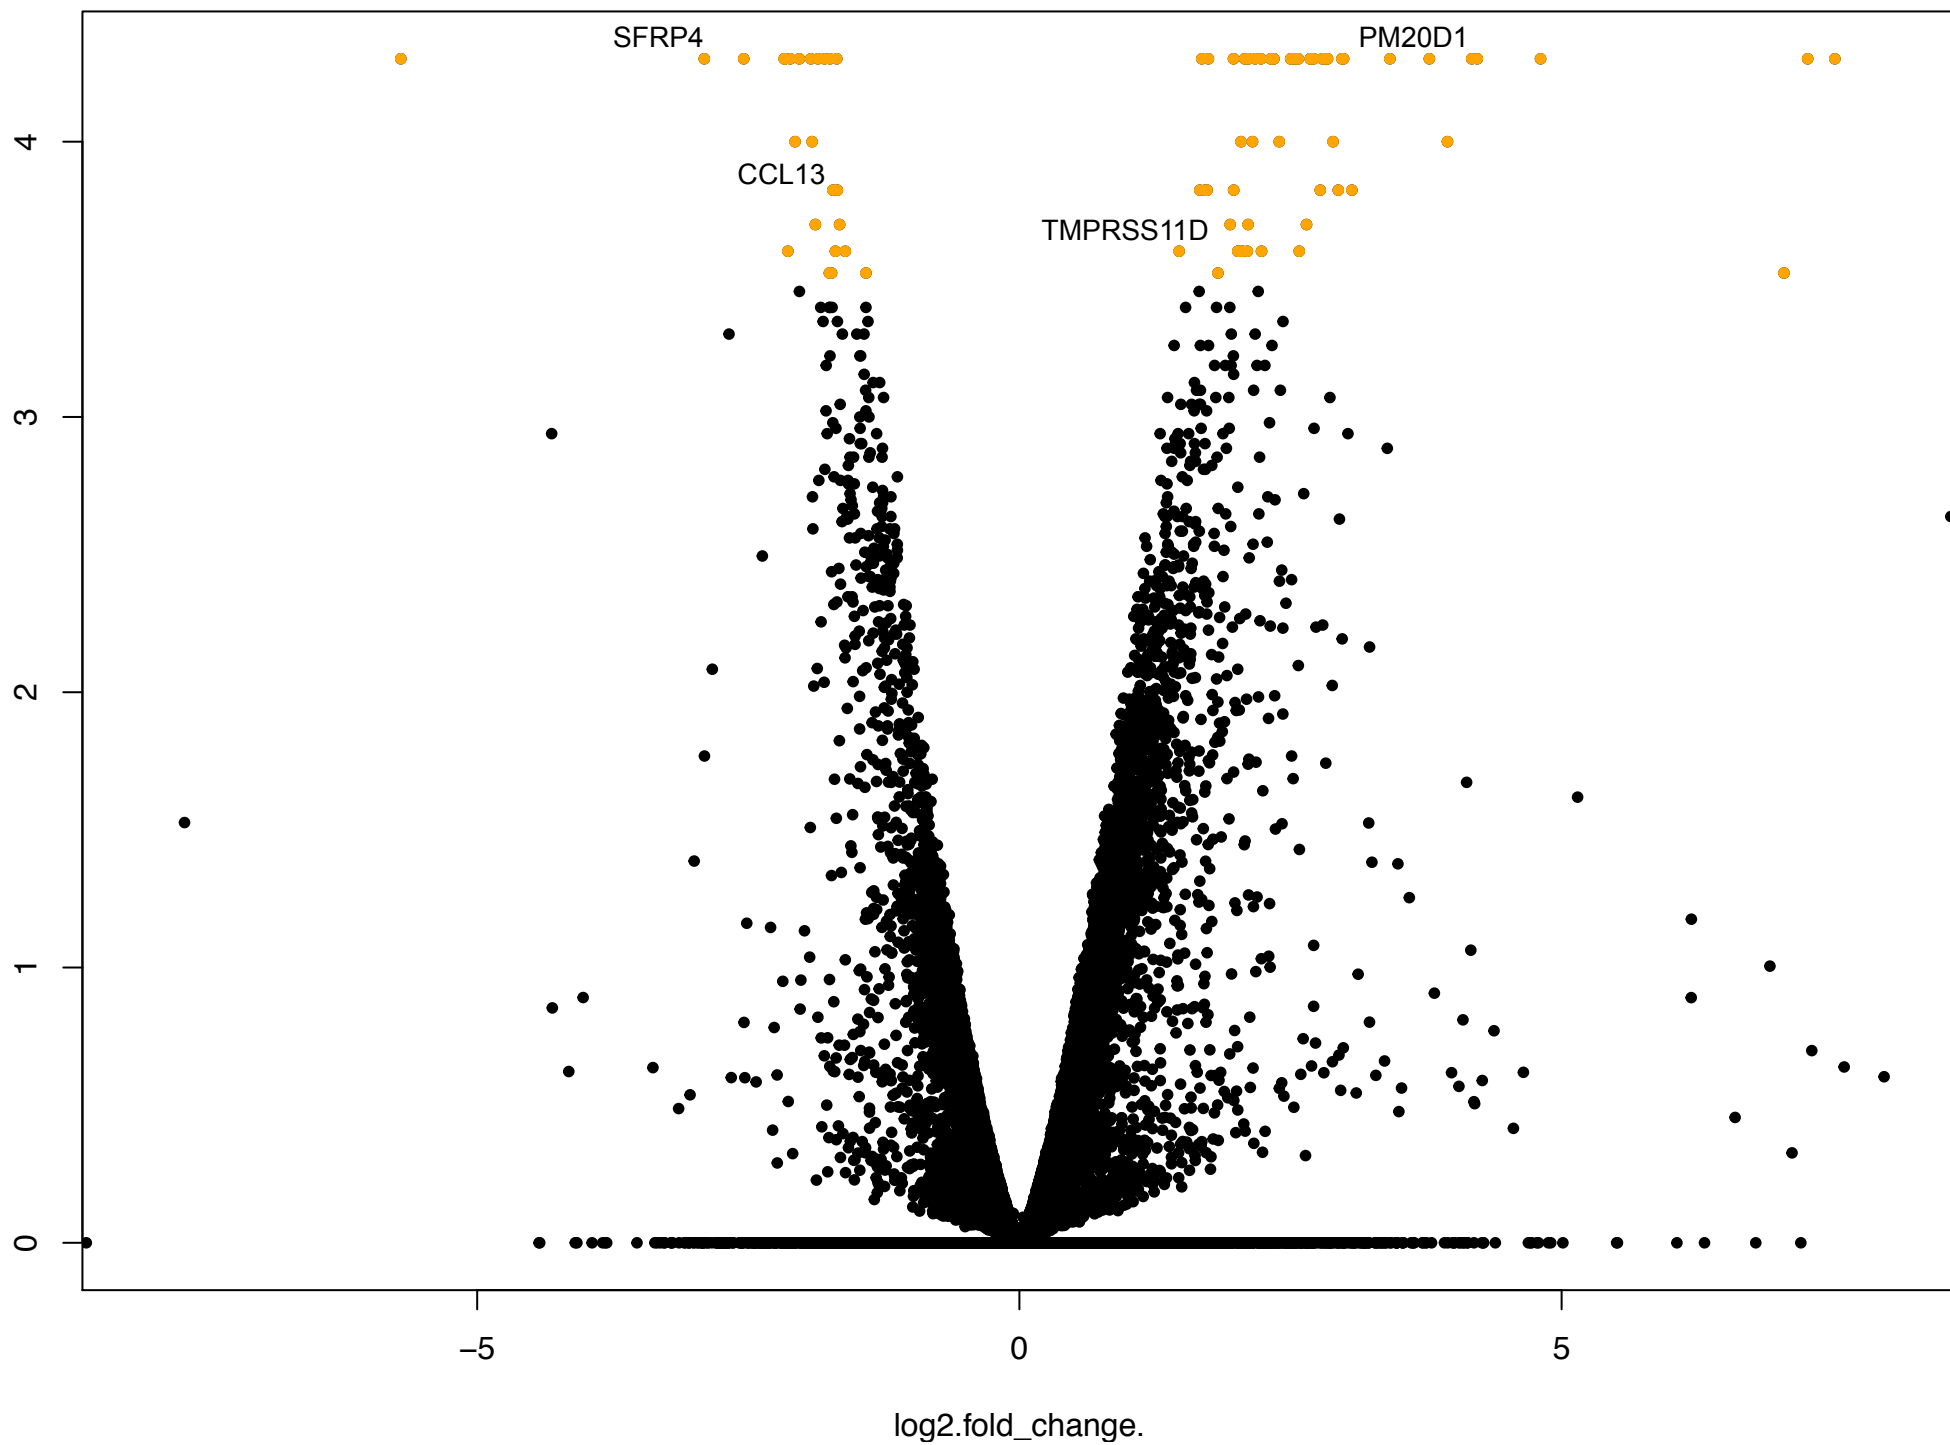

Supplement: 41598_2018_29472_MOESM1_ESM.pdf [file 41598_2018_29472_MOESM1_ESM.pdf]
